# Supplementary material for: Prevalence, incidence and carrier frequency of 5q–linked spinal muscular atrophy – a literature review
Source: Orphanet J Rare Dis. 2017 Jul 4;12:124. doi: 10.1186/s13023-017-0671-8 (PMC5496354; doi:10.1186/s13023-017-0671-8)
Supplement: Supplementary file 3 — Copy numbers SMN1 gene in general population. (XLS 52 kb) [file 13023_2017_671_MOESM3_ESM.xls]

## Sheet: Add 2_car freq copy numbers
Additional file 3: Table S2. Copy numbers SMN1 gene in general population.
		SMN1			Total no subjects
Country	Ethnicitya	1	2	³3		Article
Germany	Caucasian	4	132	4	140	Feldkötter_2002 [1]
USA	Caucasian	3	174	14	191	Ogino_2002 [2]
Germany	Caucasian	4	95	1	100	Anhuf_2003 [3]
France	Caucasian	11	313	51	375	Cusin_2003 [4]
Netherlands	Caucasian	3	154	18	175	Veldink_2005 [5]
France	Caucasian	13	593	15	621	Corcia_2006 [6]
Australia/New Zealand	Caucasian	3	133	11	147	Smith_2007 [7]
USA	Caucasian	28	935	65	1028	Hendrickson_2009 [8]
USA	Caucasian	5	178	8	191	Callum_2010 [9]
Poland	Caucasian	17	555	28	600	Jedrzejowska_2010 [10]
USA	Caucasian	16	438	46	500	Prior_2010 [11]
Portugal	Caucasian	6	308	18	332	Goncalves-Rocha_2011 [12]
Sweden	Caucasian	9	479	14	502	Corcia_2012 [13]
USA	Caucasian	494	22252	1725	24471	Sugarman_2012 [14]
Italy	Caucasian	13	409	28	450	Cali_2014 [15]
USA	Caucasian	12	415	31	458	Luo_2014 [16]
China	Asian	9	537	23	569	Chan_2004 [17]
South South-Korea	Asian	7	254	65	326	Lee_2004 [18]
Taiwan	Asian	6	276	20	302	Huang_2007 [19]
USA	Asian	18	897	112	1027	Hendrickson_2009 [8]
USA	Asian	0	9	1	10	Callum_2010 [9]
China	Asian	41	1535	136	1712	Sheng-Yuan_2010 [20]
South-Korea	Asian	2	96	1	99	Yoon_2010 [21]
Taiwan	Asian	4	139	20	163	Chen_2011 [22]
Taiwan	Asian	2262	97128	8217	107607	Su_2011 [23]
USA	Asian	73	4148	426	4647	Sugarman_2012 [14]
USA	Asian	2	222	24	248	Luo_2014 [16]
Taiwan	Asian	15	409	29	453	Wang_2015 [24]
USA	Black	11	529	475	1015	Hendrickson_2009 [8]
USA	Black	0	8	1	9	Callum_2010 [9]
USA	Black	48	2536	2299	4883	Sugarman_2012 [14]
USA	Black	5	136	135	276	Luo_2014 [16]
Sub-Saharan Africa	Black	6	440	422	868	Sangaré_2014 [25]
USA	Jewish	22	827	153	1002	Hendrickson_2009 [8]
USA	Jewish	0	31	5	36	Callum_2010 [9]
Israel	Jewish	58	3597	285	3940	Sukenik-Halevy_2010 [26]
	Jewish	10	745	25	780
	Jewish	2	189	13	204
	Jewish	3	231	12	246
	Jewish	3	144	8	155
	Jewish	33	1580	83.9982	1697
	Jewish	26	1014.01	285.994	1326
Israel	Jewish	159	5544	690	6393	Ben-Shachar_2011 [27]
USA	Jewish	78	4913	815	5806	Sugarman_2012 [14]
USA	Jewish	15	578	99	692	Luo_2014 [16]
USA	Hispanic	8	870	152	1030	Hendrickson_2009 [8]
USA	Hispanic	0	21	0	21	Callum_2010 [9]
USA	Hispanic	101	6406	1148	7655	Sugarman_2012 [14]
USA	Hispanic	1	219	42	262	Luo_2014 [16]
USA	Asian Indian	17	808	151	976	Sugarman_2012 [14]
	Total	3686	164579	18451	186716
Included are studies indicating copy number status for the same ethnic groups as used in Additional File 1.
a) Ethnicity as described in article or based on large majority of the population in the studied country.
1. Feldkotter M, Schwarzer V, Wirth R, Wienker TF, Wirth B. Quantitative analyses of SMN1 and SMN2 based on real-time lightCycler PCR: fast and highly reliable carrier testing and prediction of severity of spinal muscular atrophy. Am J Hum Genet. 2002; 70:358-68.
2. Ogino S, Leonard DG, Rennert H, Wilson RB. Spinal muscular atrophy genetic testing experience at an academic medical center. J Mol Diagn. 2002; 4:53-8.
3. Anhuf D, Eggermann T, Rudnik-Schoneborn S, Zerres K. Determination of SMN1 and SMN2 copy number using TaqMan technology. Hum Mutat. 2003; 22:74-8.
4. Cusin V, Clermont O, Gerard B, Chantereau D, Elion J. Prevalence of SMN1 deletion and duplication in carrier and normal populations: implication for genetic counselling. J Med Genet. 2003; 40:e39.
5. Veldink JH, Kalmijn S, Van der Hout AH, Lemmink HH, Groeneveld GJ, et al. SMN genotypes producing less SMN protein increase susceptibility to and severity of sporadic ALS. Neurology. 2005; 65:820-5.
6. Corcia P, Camu W, Halimi JM, Vourc'h P, Antar C, et al. SMN1 gene, but not SMN2, is a risk factor for sporadic ALS. Neurology. 2006; 67:1147-50.
7. Smith M, Calabro V, Chong B, Gardiner N, Cowie S, du Sart D. Population screening and cascade testing for carriers of SMA. Eur J Hum Genet. 2007; 15:759-66.
8. Hendrickson BC, Donohoe C, Akmaev VR, Sugarman EA, Labrousse P, et al. Differences in SMN1 allele frequencies among ethnic groups within North America. J Med Genet. 2009; 46:641-4.
9. Callum P, Iger J, Ray M, Sims CA, Falk RE. Outcome and experience of implementing spinal muscular atrophy carrier screening on sperm donors. Fertil Steril. 2010; 94:1912-4.
10. Jedrzejowska M, Milewski M, Zimowski J, Zagozdzon P, Kostera-Pruszczyk A, et al. Incidence of spinal muscular atrophy in Poland--more frequent than predicted? Neuroepidemiology. 2010; 34:152-7.
11. Prior TW, Snyder PJ, Rink BD, Pearl DK, Pyatt RE, et al. Newborn and carrier screening for spinal muscular atrophy. Am J Med Genet A. 2010; 152A:1608-16.
12. Goncalves-Rocha M, Oliveira J, Rodrigues L, Santos R. New approaches in molecular diagnosis and population carrier screening for spinal muscular atrophy. Genet Test Mol Biomarkers. 2011; 15:319-26.
13. Corcia P, Mayeux-Portas V, Khoris J, de Toffol B, Autret A, et al. Abnormal SMN1 gene copy number is a susceptibility factor for amyotrophic lateral sclerosis. Ann Neurol. 2002; 51:243-6.
14. Sugarman EA, Nagan N, Zhu H, Akmaev VR, Zhou Z, et al. Pan-ethnic carrier screening and prenatal diagnosis for spinal muscular atrophy: clinical laboratory analysis of >72,400 specimens. Eur J Hum Genet. 2012; 20:27-32.
15. Cali F, Ruggeri G, Chiavetta V, Scuderi C, Bianca S, et al. Carrier screening for spinal muscular atrophy in Italian population. J Genet. 2014; 93:179-81.
16. Luo M, Liu L, Peter I, Zhu J, Scott SA, et al. An Ashkenazi Jewish SMN1 haplotype specific to duplication alleles improves pan-ethnic carrier screening for spinal muscular atrophy. Genet Med. 2014; 16:149-56.
17. Chan V, Yip B, Yam I, Au P, Lin CK, et al. Carrier incidence for spinal muscular atrophy in southern Chinese. J Neurol. 2004; 251:1089-93.
18. Lee TM, Kim SW, Lee KS, Jin HS, Koo SK, et al. Quantitative analysis of SMN1 gene and estimation of SMN1 deletion carrier frequency in Korean population based on real-time PCR. J Korean Med Sci. 2004; 19:870-3.
19. Huang CH, Chang YY, Chen CH, Kuo YS, Hwu WL, et al. Copy number analysis of survival motor neuron genes by multiplex ligation-dependent probe amplification. Genet Med. 2007; 9:241-8.
20. Sheng-Yuan Z, Xiong F, Chen YJ, Yan TZ, Zeng J, et al. Molecular characterization of SMN copy number derived from carrier screening and from core families with SMA in a Chinese population. Eur J Hum Genet. 2010; 18:978-84.
21. Yoon S, Lee CH, Lee KA. Determination of SMN1 and SMN2 copy numbers in a Korean population using multiplex ligation-dependent probe amplification. Korean J Lab Med. 2010; 30:93-6.
22. Chen TH, Tzeng CC, Wang CC, Wu SM, Chang JG, et al. Identification of bidirectional gene conversion between SMN1 and SMN2 by simultaneous analysis of SMN dosage and hybrid genes in a Chinese population. J Neurol Sci. 2011; 308:83-7.
23. Su YN, Hung CC, Lin SY, Chen FY, Chern JP, et al. Carrier screening for spinal muscular atrophy (SMA) in 107,611 pregnant women during the period 2005-2009: a prospective population-based cohort study. PLoS One. 2011; 6:e17067.
24. Wang KC, Chang CC, Chang YF, Wang SH, Chiang CK, Tsai CP. Evaluation and characterization of a high-resolution melting analysis kit for rapid carrier-screening test of spinal muscular atrophy. J Neurogenet. 2015; 29:113-6.
25. Sangare M, Hendrickson B, Sango HA, Chen K, Nofziger J, et al. Genetics of low spinal muscular atrophy carrier frequency in sub-Saharan Africa. Ann Neurol. 2014; 75:525-32.
26. Sukenik-Halevy R, Pesso R, Garbian N, Magal N, Shohat M. Large-scale population carrier screening for spinal muscular atrophy in Israel--effect of ethnicity on the false-negative rate. Genet Test Mol Biomarkers. 2010; 14:319-24.
27. Ben-Shachar S, Orr-Urtreger A, Bardugo E, Shomrat R, Yaron Y. Large-scale population screening for spinal muscular atrophy: clinical implications. Genet Med. 2011; 13:110-4.
